# Supplementary material for: High and Sustained Ex Vivo Frequency but Altered Phenotype of SARS-CoV-2-Specific CD4+ T-Cells in an Anti-CD20-Treated Patient with Prolonged COVID-19
Source: Viruses. 2022 Jun 10;14(6):1265. doi: 10.3390/v14061265 (PMC9228841; doi:10.3390/v14061265)
Supplement: Supplementary file 1 [file viruses-14-01265-s001.zip › viruses-1730063-supplementary.pdf]

**Table S1. Flow cytometry antibody panel used for ex vivo DRB1\*11 Tetramer staining.**

| <b>Fluorochrome</b> | <b>Antigen</b> | <b>Clone</b> | <b>Supplier</b> | <b>Dilution</b> |
|---------------------|----------------|--------------|-----------------|-----------------|
| BUV737              | CD4            | SK3          | BD              | 1:300           |
| BV711               | CD39           | A1           | BioLegend       | 1:100           |
| BV650               | CCR7           | G043H7       | BioLegend       | 1:100           |
| BV605               | CD73           | AD2          | BioLegend       | 1:100           |
| BV510               | CD45RA         | HI100        | BioLegend       | 1:300           |
| BV421               | LAG-3          | 11C3C65      | BioLegend       | 1:100           |
| PerCP-Cy5.5         | CXCR5          | RF8B2        | BD              | 1:60            |
| PE-Cy7              | TIGIT          | A15153G      | BioLegend       | 1:60            |
| PE-Dazzle594        | PD-1           | EH12.2H7     | BioLegend       | 1:300           |
| AlexaFluor700       | CD3            | UCHT1        | BioLegend       | 1:75            |
| AlexaFluor647       | CD127          | A019D5       | BioLegend       | 1:300           |
| APC-Cy7             | CD14           | 63D3         | BioLegend       | 1:600           |
| APC-Cy7             | CD19           | HIB19        | BioLegend       | 1:600           |

**Table S2. Peptide pool of 10 non-Spike peptides** used for ex vivo ELISpot assay. The peptide highlighted in bold font (M protein aa145-160) covers major parts of the aa sequence loaded on the DRB1\*11 Tetramer.

| protein and amino acids    | aa sequence            |
|----------------------------|------------------------|
| N protein aa50-56          | SWFTALTQHGKEDLK        |
| N protein aa80-95          | DDQIGYYRRATRRIR        |
| N protein aa85-100         | YYRRATRRIRGGDGK        |
| N protein aa125-140        | NKDGIIWVATEGALN        |
| N protein aa215-230        | DAALALLLLDRLNQL        |
| N protein aa345-360        | FKDQVILLNKHIDAY        |
| N protein aa350-365        | ILLNKHIDAYKTFPP        |
| <b>M protein aa145-160</b> | <b>RGHLRIAGHHLGRCD</b> |
| M protein aa175-190        | LSYYKLGASQRVAGD        |
| E protein aa55-70          | FYVYSRVKNLNSSRV        |

**Table S3. Flow cytometry antibody panel used for intracellular cytokine staining.**

| <b>Fluorochrome</b> | <b>Antigen</b> | <b>Clone</b> | <b>Supplier</b> | <b>Dilution</b> |
|---------------------|----------------|--------------|-----------------|-----------------|
| BUV737              | IL-2           | MQ1-17H12    | BD              | 1:60            |
| BUV395              | TNF- $\alpha$  | Mab11        | BD              | 1:75            |
| BV711               | CD8            | RPA-T8       | BioLegend       | 1:150           |
| BV650               | CD45RA         | HI100        | BioLegend       | 1:600           |
| BV510               | CD4            | SK3          | BioLegend       | 1:300           |
| BV421               | CCR7           | G043H7       | BioLegend       | 1:300           |
| PE-Cy7              | IFN- $\gamma$  | 4S.B3        | BD              | 1:60            |
| AlexaFluor700       | CD3            | UCHT1        | BioLegend       | 1:75            |
| APC-Cy7             | CD14           | 63D3         | BioLegend       | 1:600           |
| APC-Cy7             | CD19           | HIB19        | BioLegend       | 1:600           |

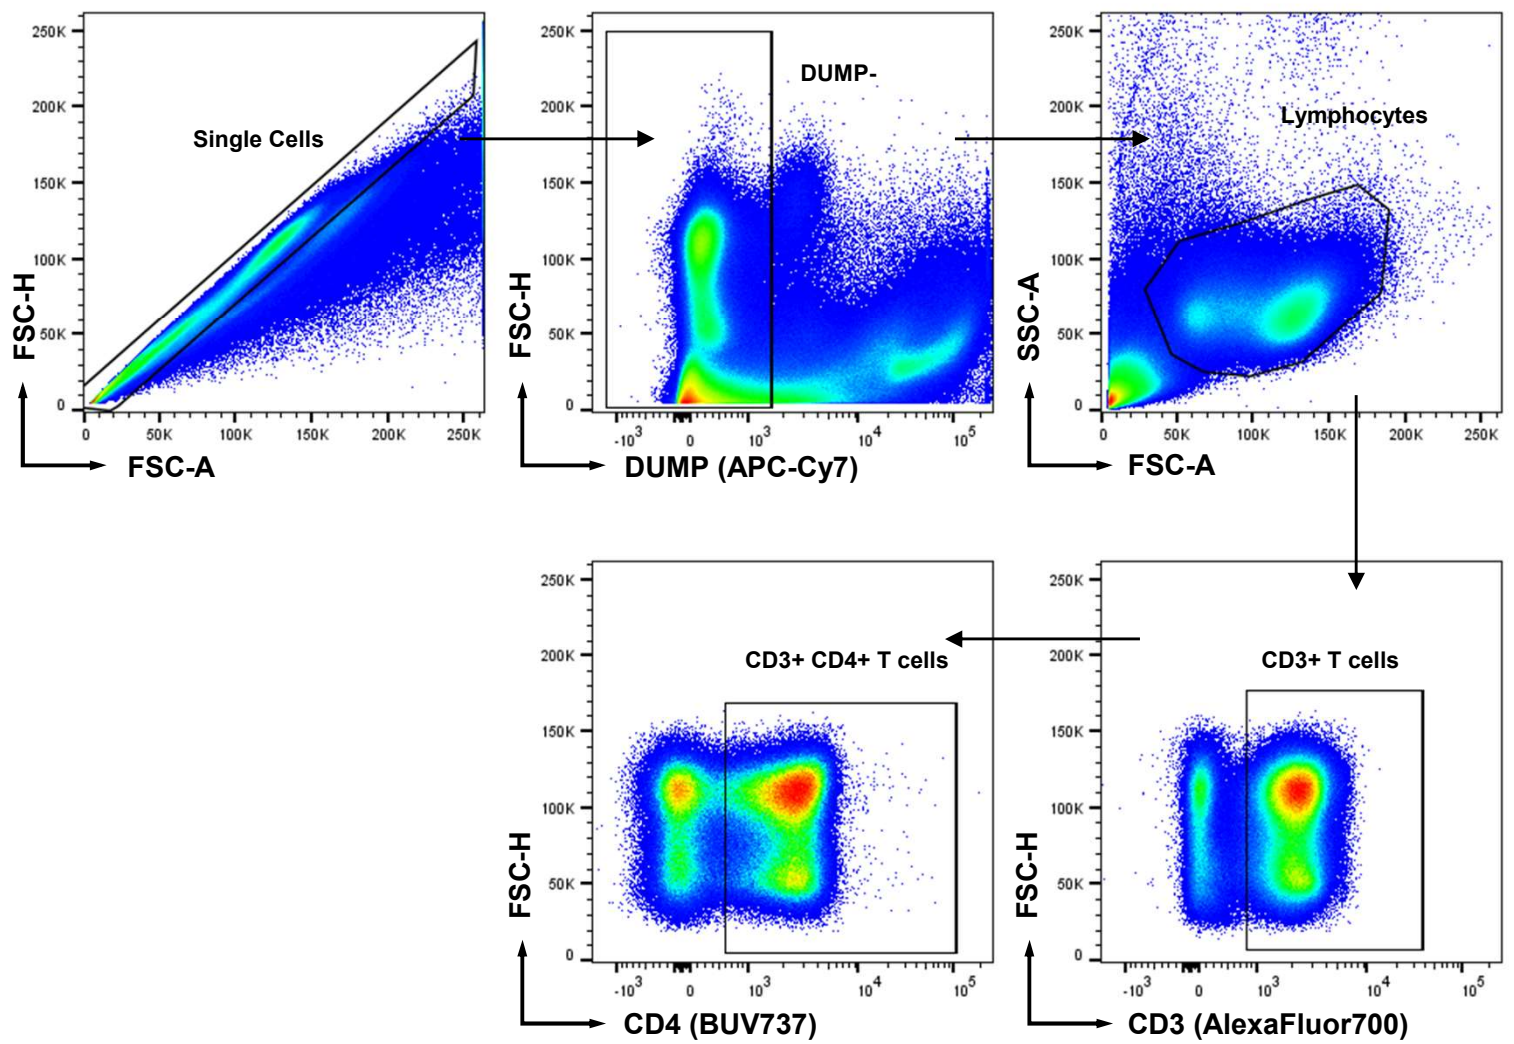

**Figure S1. Gating strategy for the identification of CD4+ T cells.** First, doublets as well as Monocytes (CD14+), B cells (CD19+) and dead cells (Zombie NIR+) were excluded. In the remaining DUMP- events, CD4+ T cells were identified as CD3 and CD4 positive lymphocytes.

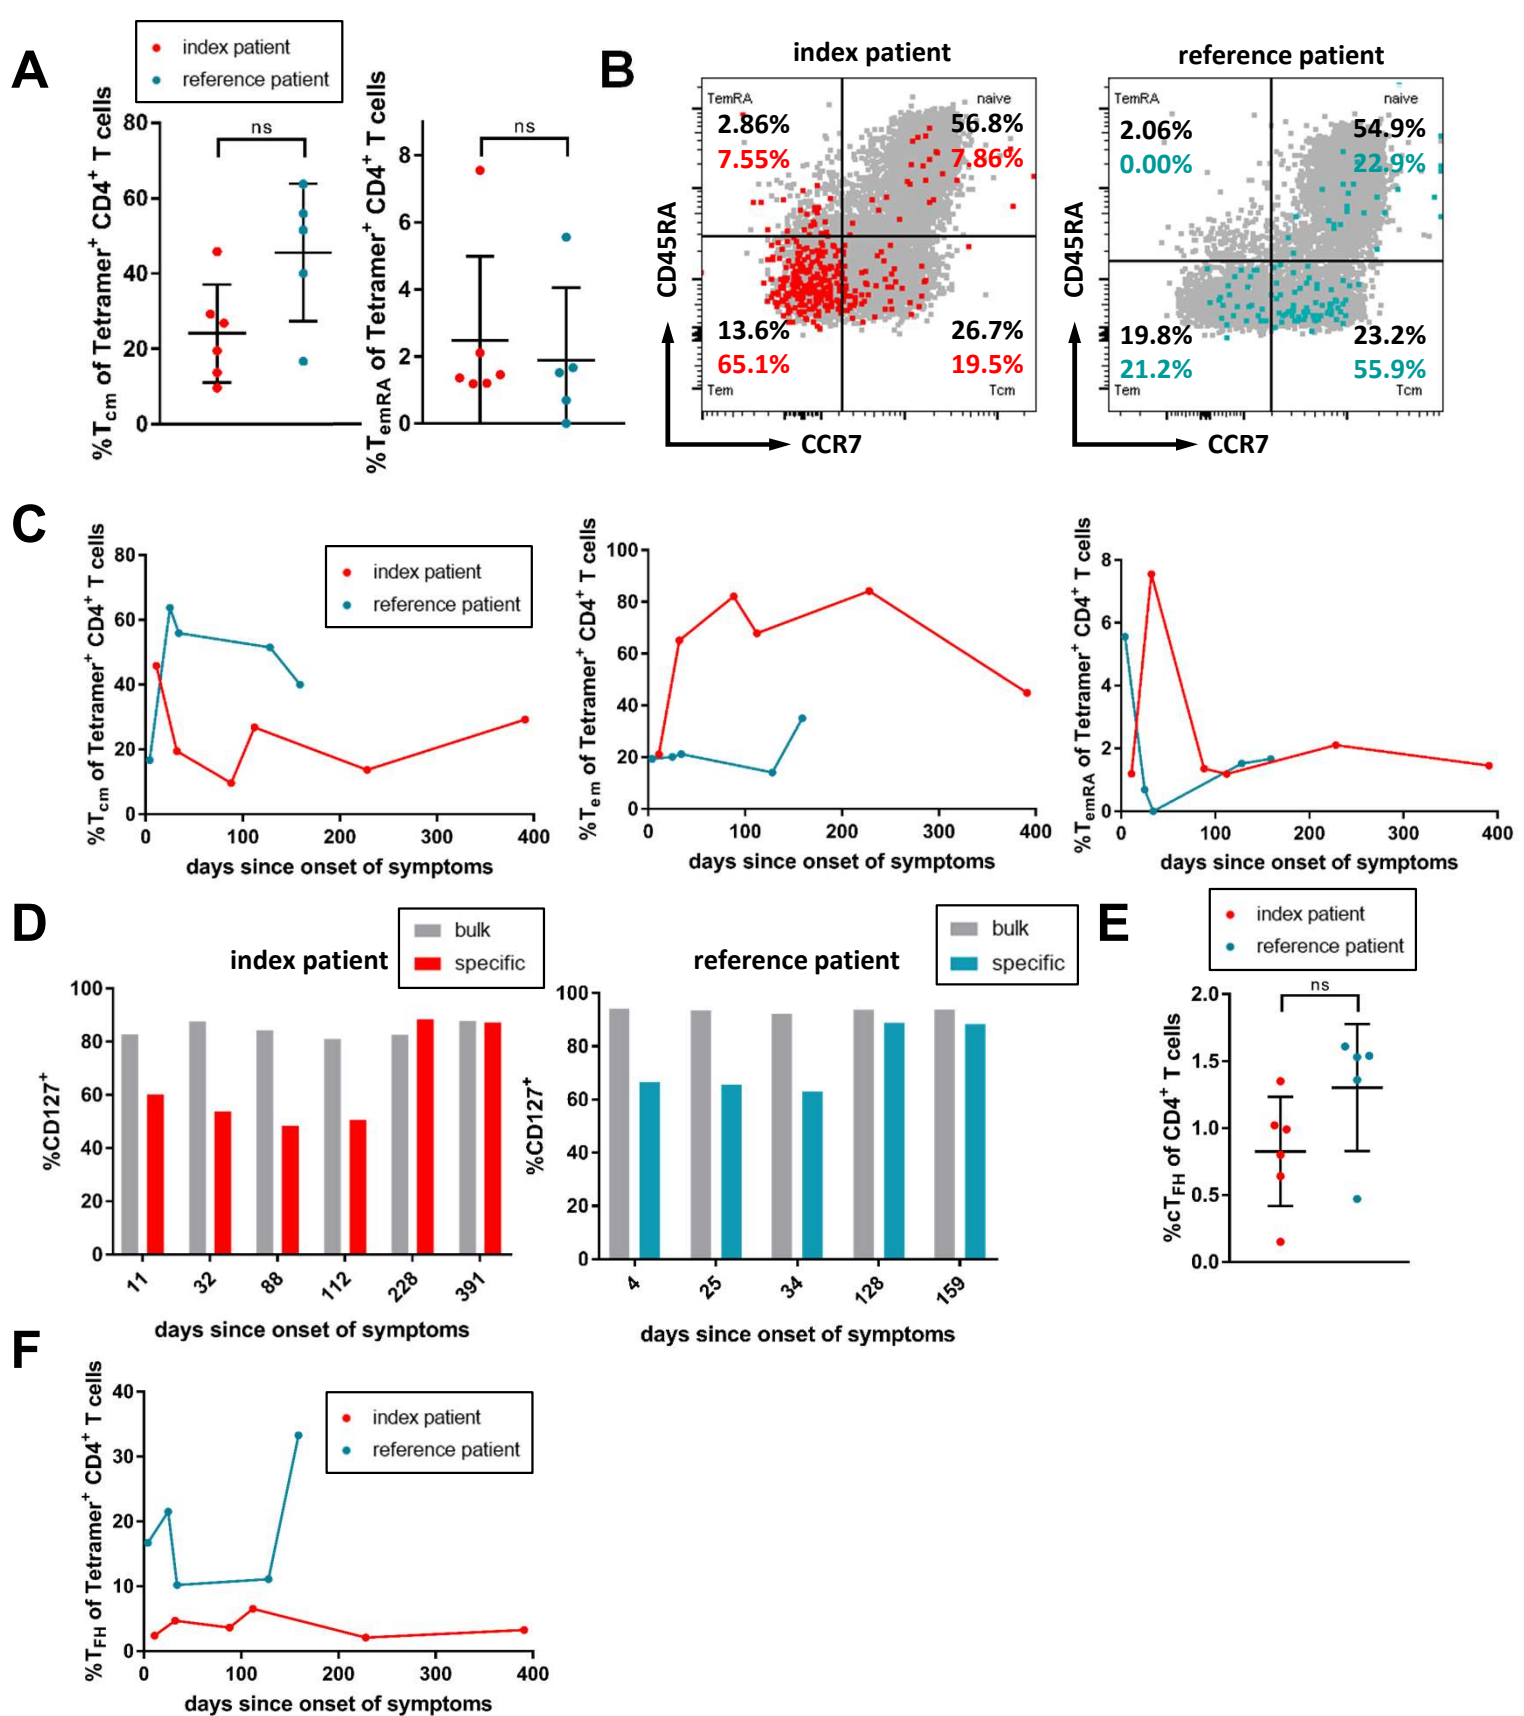

**Figure S2. Differentiation status among SARS-CoV-2 specific CD4<sup>+</sup> T cells.** In the comparison of the memory subsets within the SARS-CoV-2 specific CD4<sup>+</sup> T cells, the index patient compared to the reference patient shows slightly reduced frequencies of the Tcm phenotype and slightly elevated frequencies of the TemRA phenotype (A). Representative flow cytometry plots from day 32 (index patient; left) and day 34 (reference patient; right) of the memory phenotype support this observation (B). Longitudinal assessment of the memory phenotype of the SARS-CoV-2-specific CD4<sup>+</sup> T cells during the investigated period (C). CD127 expression on bulk (grey) and SARS-CoV-2 specific CD4<sup>+</sup> T cells of the index (red) and reference patient (blue) (D). Frequencies of bulk T cells with cTfh phenotype do not differ between the index and reference patient (E). Longitudinal assessment of SARS-CoV-2 specific CD4<sup>+</sup> T cells with cTfh phenotype (F).

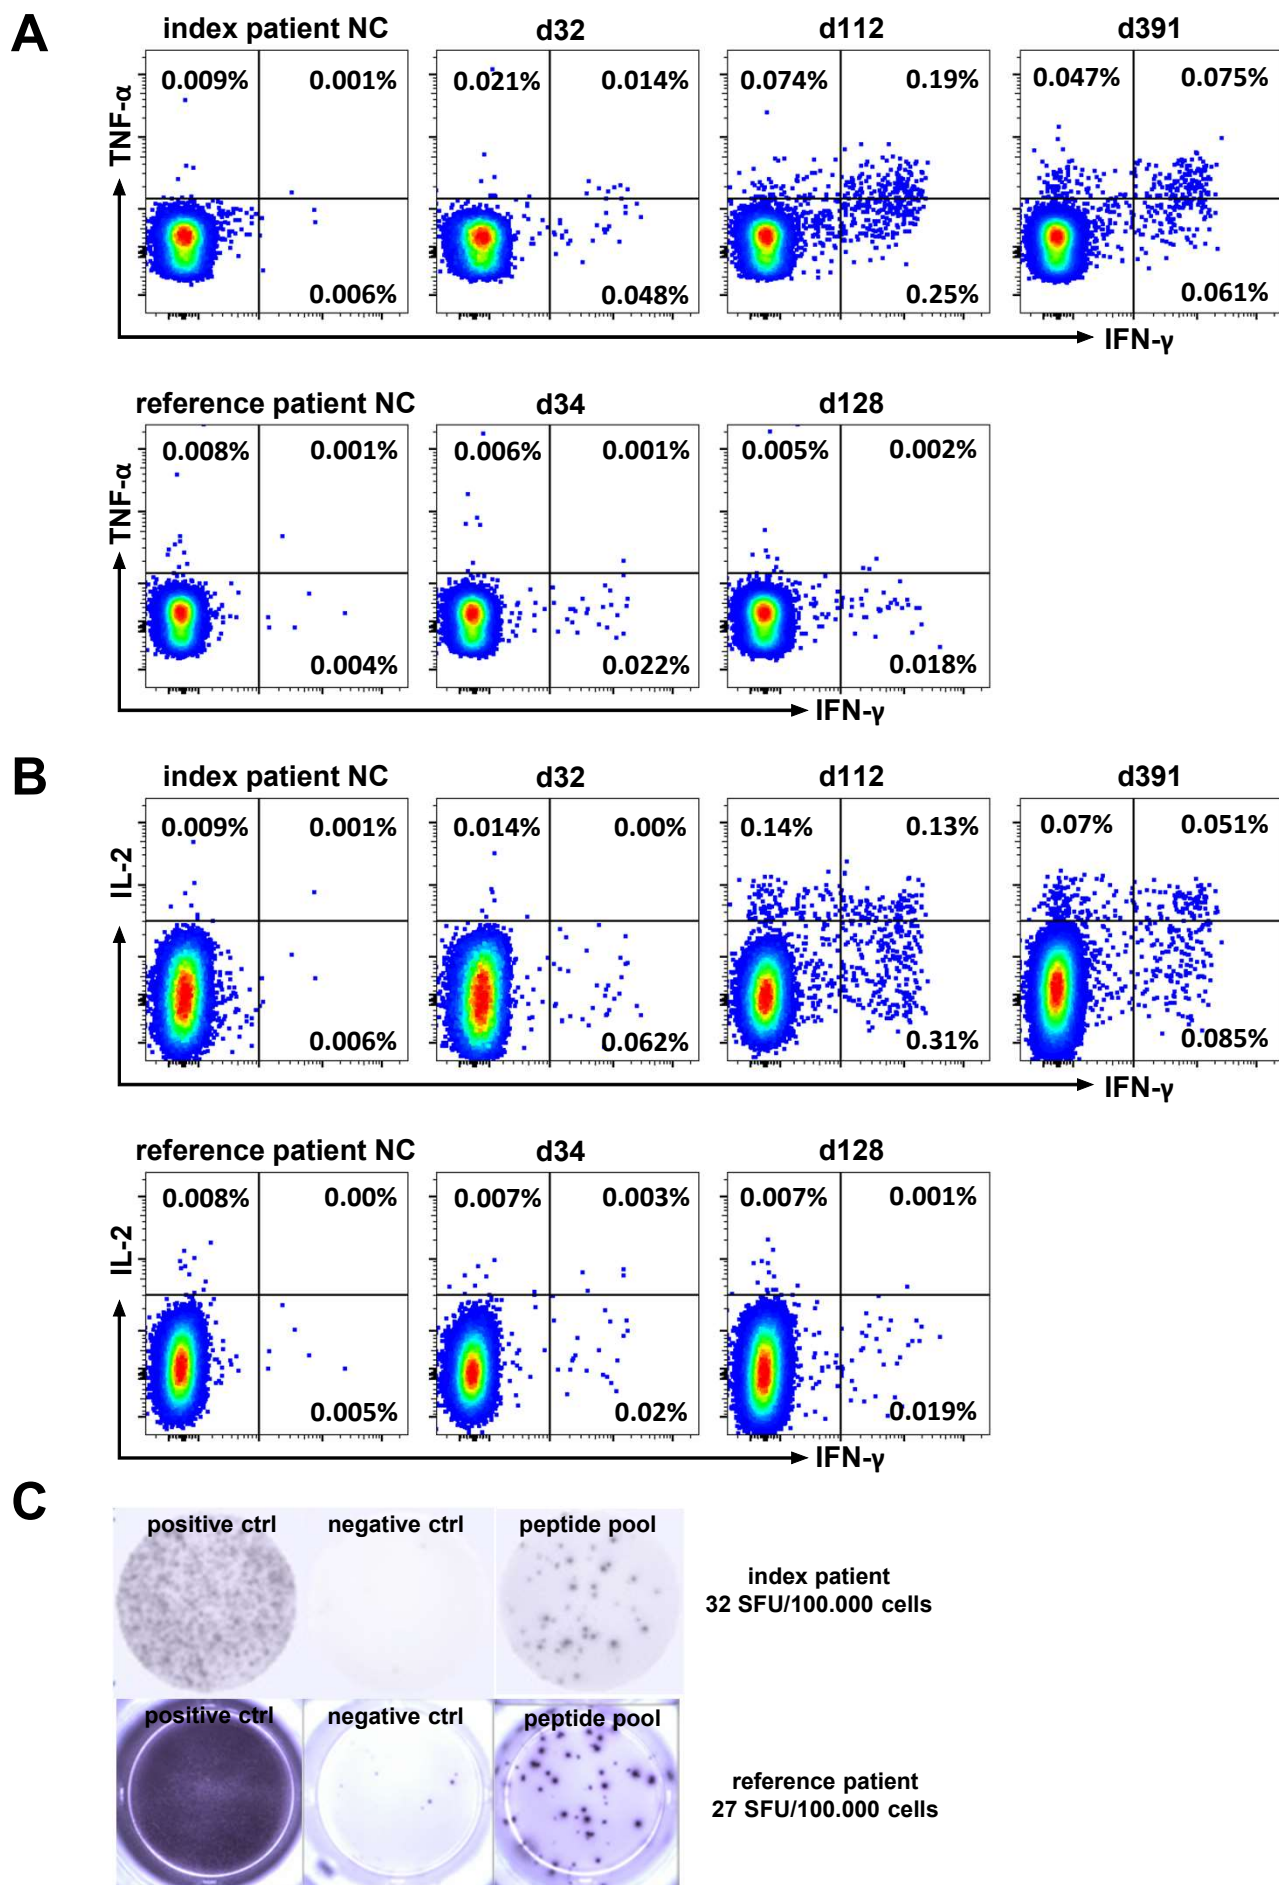

**Figure S3. Cytokine responses to a pool of non-spike peptides.** Dot plots from intracellular cytokine staining reveal higher frequencies of CD4<sup>+</sup> T cells co-producing IFN- $\gamma$  and TNF- $\alpha$  (A) or IFN- $\gamma$  and IL-2 (B) after peptide pool stimulation in the index patient compared to the reference patient. NC indicates negative controls. IFN- $\gamma$  ELISpot shows relevant IFN- $\gamma$  response 17 months (index patient, upper row) and 8 months (reference patient, lower row) after the onset of symptoms (C).

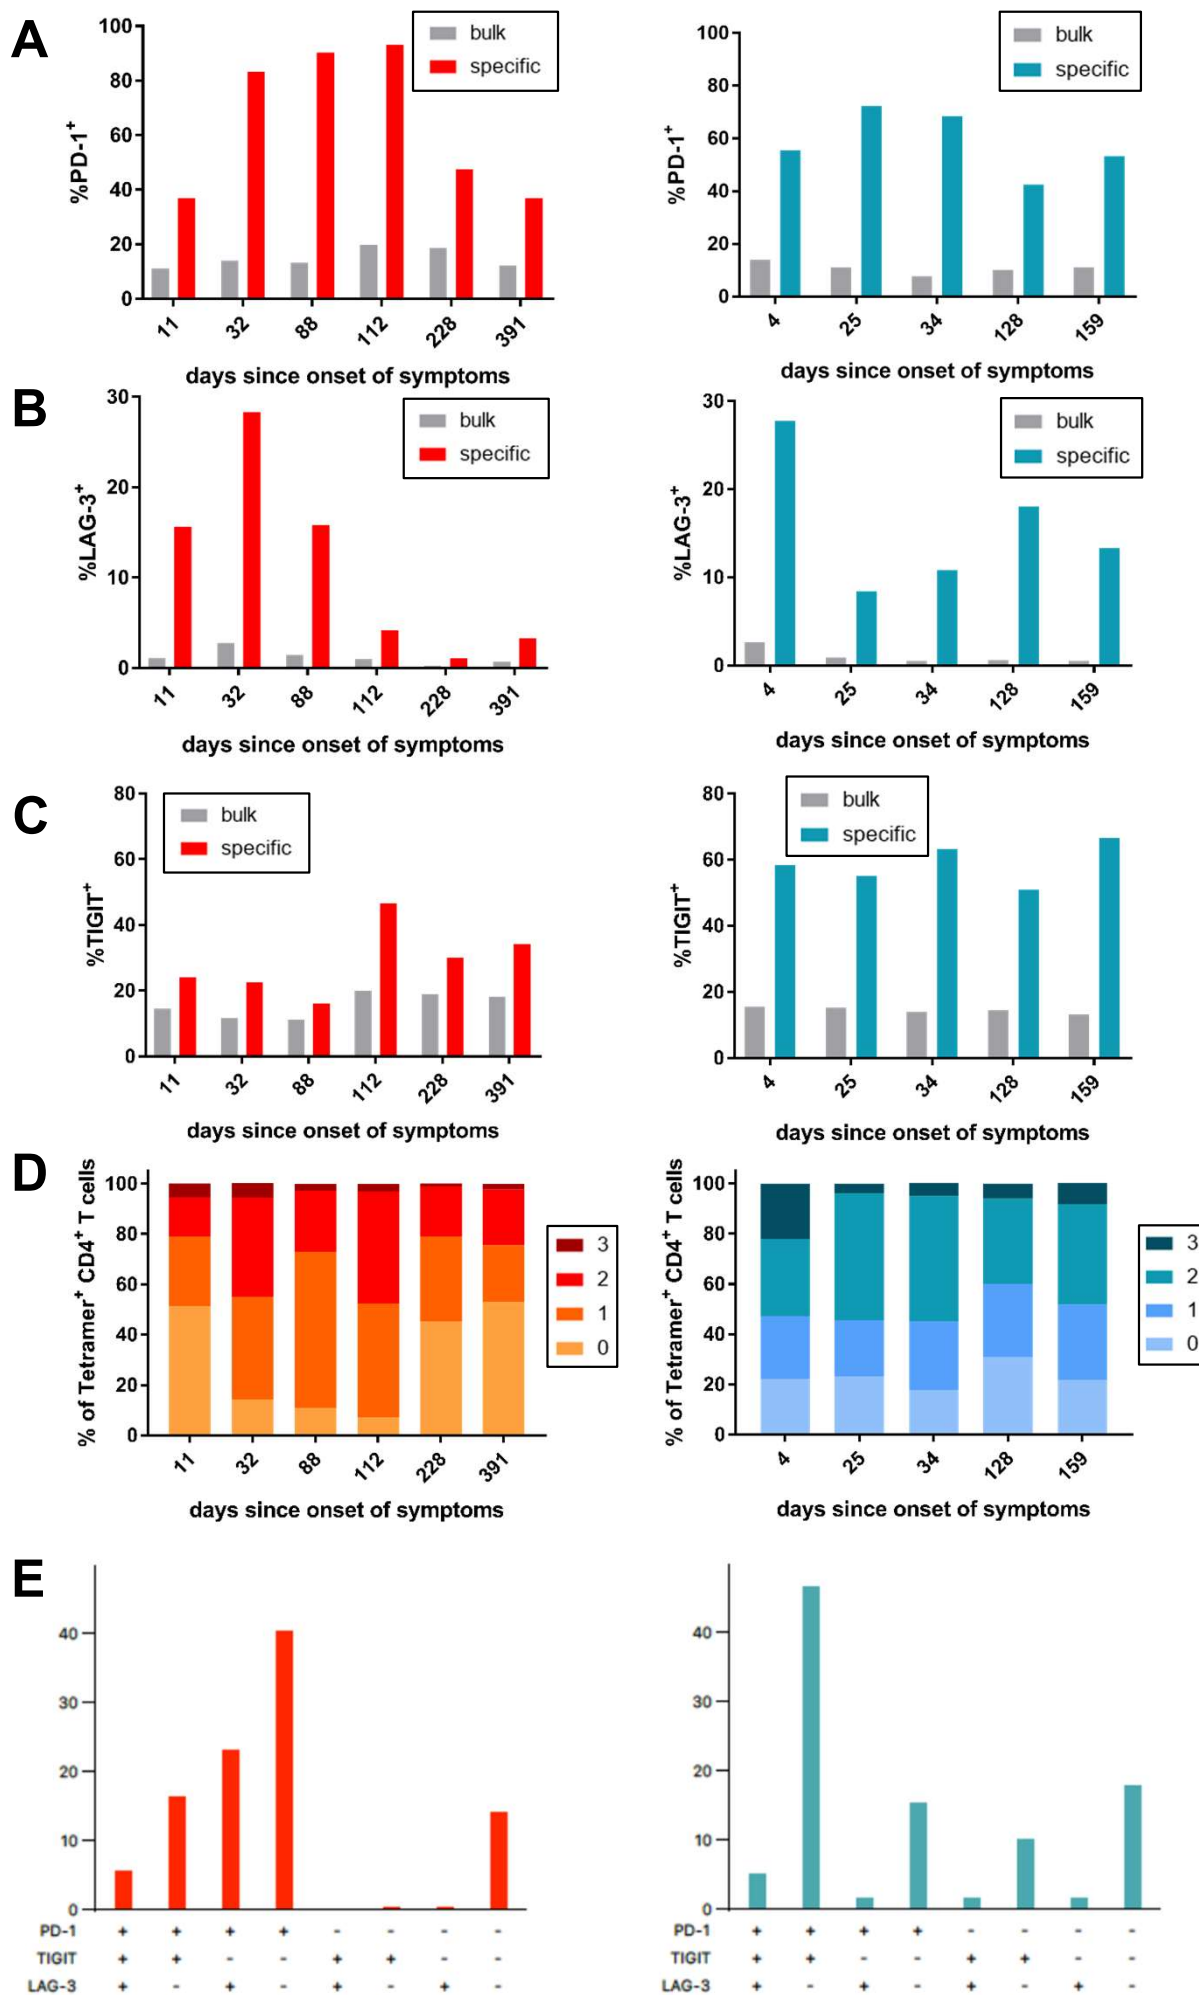

**Figure S4. Co-inhibitory receptor expression and co-expression on bulk and SARS-CoV-2 specific CD4<sup>+</sup> T cells.** Expression of PD-1 (A), LAG-3 (B) and TIGIT (C) on bulk (grey) and SARS-CoV-2 specific CD4<sup>+</sup> T cells during the investigated period for the index patient (left; red) and the reference patient (right; blue). Analysis of the number of co-expressed co-inhibitory receptors (PD-1, LAG-3, TIGIT) on SARS-CoV-2 specific CD4<sup>+</sup> T cells of the index patient (left; red) and the reference patient (right; blue) at different time points (D). Exemplary co-Expression analysis of PD-1, LAG-3 and TIGIT on SARS-CoV-2 specific CD4<sup>+</sup> T cells of the index patient (day 32; red) and the reference patient (day 34; blue).

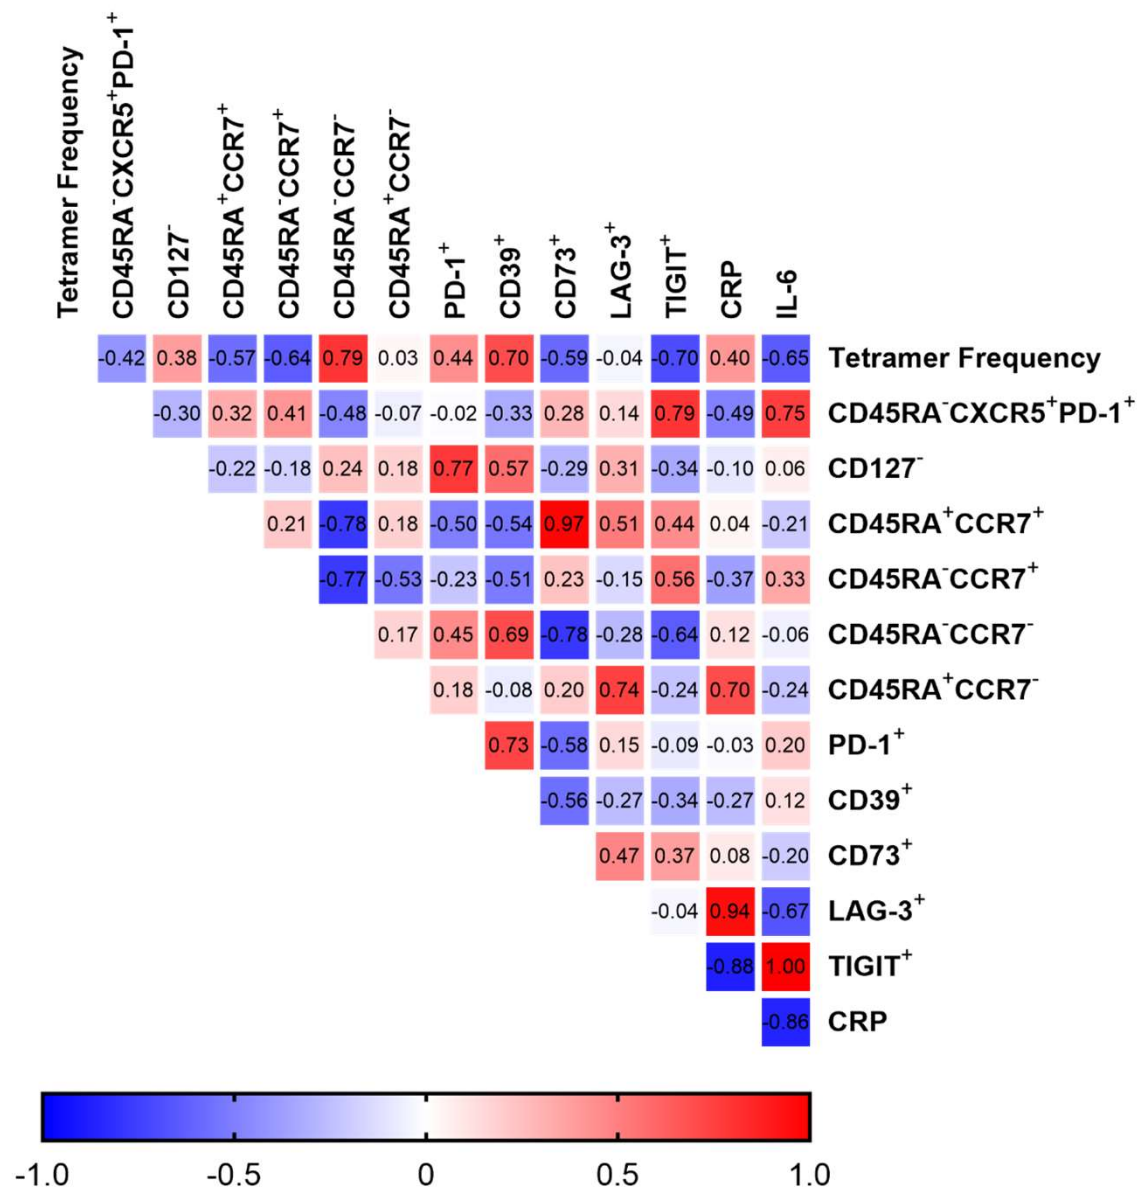

**Figure S5. Correlogram of the Tetramer+ CD4+ T cell phenotype.** The phenotype of SARS-CoV-2-specific CD4+ T cells at individual time points was correlated. Pearson r was rounded to two decimals.
